# Supplementary material for: A deep learning model for prediction of post hepatectomy liver failure after hemihepatectomy using preoperative contrast-enhanced computed tomography: a retrospective study
Source: Front Med (Lausanne). 2023 Jun 28;10:1154314. doi: 10.3389/fmed.2023.1154314 (PMC10336538; doi:10.3389/fmed.2023.1154314)
Supplement: Supplementary file 1 [file Data_Sheet_1.XLSX]

## Sheet: Sheet1
Number	Gender	Age	Viral hepatitis	Liver Cirrhosis	Child-Pugh	Diagnosis	ASA	Surgical approach	Extent of resection	Operation time (min)	Blood loss (ml)	PHLF	PHLF-Grade	Prediction
1	F	68	No	NO	A	Hepatolithiasis	2	Laparotomy	left liver resection	170	50	No	0	0
2	F	63	No	NO	A	ICC	2	Laparoscopy	left liver resection	150	50	No	0	0
3	M	51	No	NO	A	Hepatolithiasis	3	Laparoscopy	left liver resection	200	200	No	0	0
4	F	54	No	NO	A	Benign tumor	2	Laparoscopy	left liver resection	150	100	No	0	0
5	M	54	Yes	NO	B	ICC	2	Laparoscopy	left liver resection	170	200	No	0	0
6	F	57	No	NO	A	ICC	2	Laparotomy	left liver resection	350	700	No	0	0
7	F	44	No	NO	A	Benign tumor	2	Laparoscopy	left liver resection	140	20	No	0	0
8	M	71	No	NO	B	ICC	2	Laparoscopy	left liver resection	260	100	No	0	1
9	M	59	No	NO	A	Benign tumor	2	Laparotomy	left liver resection	435	1000	No	0	0
10	F	43	No	NO	A	Hepatolithiasis	2	Laparoscopy	left liver resection	245	300	No	0	0
11	M	57	No	NO	A	Hepatolithiasis	2	Laparotomy	left liver resection	140	300	No	0	0
12	F	72	No	NO	A	ICC	2	Laparoscopy	left liver resection	85	200	No	0	0
13	F	57	No	NO	A	Hepatolithiasis	2	Laparoscopy	left liver resection	260	300	No	0	0
14	F	67	No	NO	A	Hepatolithiasis	2	Laparoscopy	left liver resection	315	100	No	0	0
15	M	62	No	NO	A	Hepatolithiasis	2	Laparotomy	left liver resection	235	1000	No	0	0
16	M	73	No	NO	A	Benign tumor	2	Laparoscopy	left liver resection	350	100	No	0	0
17	F	65	No	NO	A	liver metastases	2	Laparotomy	left liver resection	125	200	No	0	1
18	F	72	No	NO	A	Benign tumor	2	Laparoscopy	left liver resection	320	10	No	0	0
19	F	51	No	NO	A	Others	2	Laparoscopy	left liver resection	480	300	No	0	0
20	M	76	No	NO	A	ICC	2	Laparoscopy	left liver resection	195	100	No	0	0
21	F	53	No	NO	A	Hepatolithiasis	2	Laparoscopy	left liver resection	190	50	No	0	0
22	M	51	No	NO	A	Hepatolithiasis	2	Laparoscopy	left liver resection	270	100	No	0	0
23	M	57	No	NO	A	Hepatolithiasis	2	Laparotomy	left liver resection	465	250	No	0	0
24	M	67	Yes	NO	A	ICC	2	Laparotomy	left liver resection	470	500	No	0	1
25	F	50	No	NO	A	Hepatolithiasis	2	Laparotomy	left liver resection	205	200	No	0	0
26	F	73	No	NO	B	ICC	2	Laparotomy	left liver resection	340	200	No	0	0
27	F	58	No	NO	A	Benign tumor	2	Laparoscopy	left liver resection	165	200	No	0	0
28	F	31	No	NO	A	Hepatolithiasis	1	Laparoscopy	left liver resection	310	200	No	0	0
29	F	64	No	NO	A	Hepatolithiasis	2	Laparoscopy	left liver resection	200	100	No	0	0
30	M	65	No	NO	B	ICC	2	Laparoscopy	left liver resection	440	400	No	0	0
31	M	65	No	NO	A	ICC	2	Laparoscopy	left liver resection	365	200	No	0	0
32	F	35	No	NO	A	Hepatolithiasis	2	Laparoscopy	left liver resection	220	100	No	0	0
33	F	68	No	NO	A	ICC	3	Laparotomy	left liver resection	250	200	No	0	0
34	M	65	No	NO	A	Hepatolithiasis	2	Laparoscopy	left liver resection	190	100	No	0	0
35	F	61	No	NO	A	ICC	2	Laparoscopy	left liver resection	525	600	No	0	1
36	F	68	No	NO	A	ICC	2	Laparotomy	left liver resection	335	200	No	0	0
37	F	58	No	NO	A	ICC	2	Laparoscopy	left liver resection	240	100	No	0	1
38	M	72	No	NO	A	ICC	2	Laparotomy	left liver resection	330	600	No	0	0
39	M	85	No	NO	A	Hepatolithiasis	2	Laparotomy	left liver resection	125	50	No	0	1
40	M	57	No	NO	A	Hepatolithiasis	2	Laparotomy	right liver resection	165	100	No	0	0
41	F	54	No	NO	A	Benign tumor	2	Laparotomy	right liver resection	345	400	No	0	0
42	F	51	No	NO	A	Hepatolithiasis	2	Laparoscopy	right liver resection	335	400	No	0	0
43	F	53	No	NO	A	Hepatolithiasis	2	Laparotomy	right liver resection	350	500	No	0	0
44	F	57	No	NO	A	Hepatolithiasis	2	Laparoscopy	right liver resection	360	1200	No	0	0
45	M	52	No	Yes	A	Hepatolithiasis	2	Laparoscopy	right liver resection	235	150	No	0	0
46	F	57	No	NO	B	ICC	2	Laparotomy	right liver resection	375	2500	No	0	0
47	F	54	No	NO	A	Hepatolithiasis	2	Laparotomy	right liver resection	180	500	No	0	0
48	F	75	No	NO	A	Others	2	Laparoscopy	right liver resection	400	400	No	0	0
49	F	74	No	NO	B	HCC	3	Laparotomy	right liver resection	270	1000	No	0	1
50	F	33	No	NO	A	Benign tumor	2	Laparoscopy	left liver resection	265	100	No	0	0
51	M	75	No	NO	A	Hepatolithiasis	2	Laparoscopy	left liver resection	230	650	No	0	0
52	M	61	No	NO	A	liver metastases	2	Laparoscopy	left liver resection	195	300	No	0	0
53	F	65	No	NO	A	Hepatolithiasis	2	Laparoscopy	left liver resection	120	50	No	0	0
54	F	59	No	NO	A	Hepatolithiasis	2	Laparoscopy	left liver resection	190	400	No	0	0
55	M	66	No	NO	A	Hepatolithiasis	2	Laparoscopy	left liver resection	228	100	No	0	0
56	M	63	Yes	NO	A	HCC	2	Laparoscopy	left liver resection	170	200	No	0	0
57	M	70	Yes	NO	A	HCC	2	Laparoscopy	left liver resection	175	50	No	0	0
58	F	46	No	NO	A	Hepatolithiasis	2	Laparoscopy	left liver resection	165	100	No	0	0
59	M	61	No	NO	A	Hepatolithiasis	2	Laparoscopy	left liver resection	240	300	No	0	0
60	F	67	No	NO	A	Hepatolithiasis	2	Laparoscopy	left liver resection	240	100	No	0	0
61	M	65	No	NO	A	ICC	2	Laparoscopy	left liver resection	260	500	No	0	0
62	F	30	Yes	NO	A	HCC	2	Laparoscopy	left liver resection	195	500	No	0	0
63	M	59	Yes	Yes	A	HCC	2	Laparoscopy	left liver resection	205	500	No	0	1
64	F	70	No	NO	A	Hepatolithiasis	2	Laparoscopy	left liver resection	240	50	No	0	0
65	F	63	No	NO	A	Benign tumor	2	Laparoscopy	left liver resection	235	400	No	0	0
66	F	58	No	NO	A	Hepatolithiasis	2	Laparoscopy	left liver resection	195	300	No	0	0
67	M	55	No	NO	A	ICC	2	Laparoscopy	left liver resection	120	20	No	0	0
68	M	55	Yes	NO	A	HCC	2	Laparotomy	left liver resection	155	200	No	0	1
69	F	57	No	NO	A	Hepatolithiasis	2	Laparoscopy	left liver resection	185	50	No	0	0
70	M	53	No	NO	A	HCC	2	Laparotomy	left liver resection	288	800	No	0	0
71	M	23	No	NO	A	HCC	2	Laparoscopy	left liver resection	195	200	No	0	0
72	F	47	No	NO	A	Hepatolithiasis	2	Laparoscopy	left liver resection	384	100	No	0	0
73	F	58	No	NO	A	Hepatolithiasis	2	Laparoscopy	left liver resection	135	50	No	0	0
74	F	70	No	NO	A	Hepatolithiasis	2	Laparoscopy	left liver resection	160	200	No	0	0
75	F	50	No	NO	A	Hepatolithiasis	2	Laparoscopy	left liver resection	185	100	No	0	0
76	F	63	Yes	NO	A	HCC	2	Laparoscopy	left liver resection	180	100	No	0	0
77	M	46	Yes	NO	A	HCC	2	Laparotomy	left liver resection	270	800	No	0	0
78	F	56	No	NO	A	Hepatolithiasis	2	Laparoscopy	left liver resection	140	50	No	0	0
79	M	70	No	NO	A	HCC	1	Laparoscopy	left liver resection	300	200	No	0	0
80	M	65	Yes	NO	A	Others	2	Laparotomy	left liver resection	185	200	No	0	0
81	M	55	Yes	Yes	A	HCC	2	Laparoscopy	left liver resection	200	100	No	0	0
82	F	76	No	NO	A	Hepatolithiasis	2	Laparoscopy	left liver resection	240	500	No	0	0
83	F	56	No	NO	A	Hepatolithiasis	2	Laparoscopy	left liver resection	125	50	No	0	0
84	F	56	No	NO	A	Hepatolithiasis	2	Laparoscopy	left liver resection	225	200	No	0	0
85	M	47	No	NO	A	HCC	2	Laparoscopy	left liver resection	145	100	No	0	0
86	M	50	Yes	NO	A	ICC	2	Laparoscopy	left liver resection	300	200	No	0	0
87	F	56	Yes	Yes	A	HCC	3	Laparoscopy	left liver resection	140	20	No	0	0
88	F	69	Yes	NO	A	Hepatolithiasis	2	Laparoscopy	left liver resection	145	100	No	0	0
89	F	39	Yes	NO	A	Hepatolithiasis	2	Laparoscopy	left liver resection	190	300	No	0	0
90	M	57	Yes	Yes	A	HCC	2	Laparoscopy	left liver resection	220	200	No	0	1
91	M	71	No	NO	A	HCC	2	Laparoscopy	left liver resection	155	100	No	0	0
92	M	43	Yes	NO	A	HCC	2	Laparoscopy	left liver resection	140	50	No	0	0
93	M	74	Yes	NO	A	HCC	2	Laparoscopy	left liver resection	205	200	No	0	0
94	M	70	Yes	NO	A	HCC	2	Laparotomy	left liver resection	205	200	No	0	0
95	M	60	No	NO	A	HCC	2	Laparotomy	left liver resection	380	1200	No	0	0
96	F	80	No	NO	A	ICC	2	Laparoscopy	left liver resection	155	100	No	0	0
97	M	40	No	NO	B	Hepatolithiasis	2	Laparoscopy	left liver resection	160	50	No	0	0
98	F	53	No	NO	A	Hepatolithiasis	2	Laparoscopy	left liver resection	220	200	No	0	0
99	F	54	No	NO	A	Hepatolithiasis	2	Laparotomy	left liver resection	170	150	No	0	0
100	F	74	No	NO	A	ICC	2	Laparoscopy	left liver resection	180	200	No	0	0
101	F	58	No	NO	A	Hepatolithiasis	2	Laparoscopy	left liver resection	300	50	No	0	0
102	M	61	No	NO	A	Hepatolithiasis	2	Laparoscopy	left liver resection	180	400	No	0	0
103	F	60	No	NO	A	Hepatolithiasis	2	Laparoscopy	left liver resection	240	400	No	0	0
104	M	83	No	NO	A	Hepatolithiasis	2	Laparoscopy	left liver resection	400	400	No	0	0
105	M	68	No	NO	A	Benign tumor	2	Laparoscopy	left liver resection	350	250	No	0	0
106	M	52	No	NO	A	Benign tumor	2	Laparoscopy	left liver resection	185	200	No	0	0
107	F	64	No	NO	A	Hepatolithiasis	2	Laparoscopy	left liver resection	185	50	No	0	0
108	M	42	No	NO	A	Benign tumor	2	Laparoscopy	left liver resection	360	400	No	0	0
109	M	59	No	NO	A	Hepatolithiasis	2	Laparoscopy	left liver resection	215	300	No	0	0
110	M	58	No	NO	A	Hepatolithiasis	2	Laparoscopy	left liver resection	120	50	No	0	0
111	M	46	Yes	Yes	A	HCC	2	Laparoscopy	left liver resection	135	20	No	0	0
112	F	75	No	NO	A	Others	2	Laparoscopy	left liver resection	150	50	No	0	0
113	M	48	No	NO	A	Hepatolithiasis	2	Laparoscopy	left liver resection	215	300	No	0	0
114	F	52	No	NO	A	Hepatolithiasis	2	Laparoscopy	left liver resection	390	500	No	0	0
115	F	86	No	NO	A	Hepatolithiasis	2	Laparoscopy	left liver resection	150	50	No	0	0
116	F	73	No	NO	A	Benign tumor	2	Laparoscopy	left liver resection	170	50	No	0	0
117	M	49	No	NO	A	Hepatolithiasis	2	Laparoscopy	left liver resection	120	50	No	0	0
118	M	64	No	NO	A	ICC	2	Laparoscopy	left liver resection	195	50	No	0	0
119	F	47	No	NO	A	Benign tumor	2	Laparoscopy	left liver resection	250	2000	No	0	0
120	F	63	No	NO	A	Others	2	Laparoscopy	left liver resection	305	100	No	0	0
121	F	34	No	NO	A	Hepatolithiasis	2	Laparoscopy	left liver resection	70	50	No	0	0
122	M	69	No	NO	A	ICC	2	Laparoscopy	left liver resection	295	200	No	0	0
123	F	56	No	NO	A	Hepatolithiasis	2	Laparoscopy	left liver resection	135	50	No	0	0
124	F	42	No	NO	A	Hepatolithiasis	2	Laparoscopy	left liver resection	165	200	No	0	0
125	F	62	Yes	NO	A	HCC	2	Laparoscopy	left liver resection	270	200	No	0	0
126	M	63	No	NO	A	Hepatolithiasis	2	Laparoscopy	left liver resection	100	180	No	0	0
127	M	73	No	NO	B	ICC	3	Laparotomy	left liver resection	430	1200	No	0	0
128	M	78	No	NO	A	HCC	2	Laparotomy	left liver resection	170	200	No	0	0
129	F	47	No	NO	A	Hepatolithiasis	2	Laparoscopy	left liver resection	120	50	No	0	0
130	M	36	Yes	Yes	A	HCC	1	Laparotomy	left liver resection	190	200	No	0	0
131	M	62	No	NO	A	Benign tumor	2	Laparoscopy	left liver resection	435	200	No	0	0
132	M	58	Yes	NO	A	HCC	2	Laparoscopy	left liver resection	235	50	No	0	0
133	M	73	No	NO	A	HCC	2	Laparoscopy	left liver resection	200	200	No	0	0
134	F	52	No	NO	A	Benign tumor	2	Laparoscopy	left liver resection	335	700	No	0	1
135	F	33	No	NO	A	Benign tumor	2	Laparoscopy	left liver resection	290	300	No	0	1
136	F	77	No	NO	A	ICC	2	Laparotomy	left liver resection	295	200	No	0	0
137	F	65	No	NO	A	ICC	2	Laparoscopy	left liver resection	235	100	No	0	0
138	F	34	No	NO	A	Benign tumor	2	Laparoscopy	left liver resection	225	100	No	0	0
139	M	63	Yes	NO	A	HCC	2	Laparoscopy	left liver resection	250	200	No	0	0
140	F	64	No	NO	A	Hepatolithiasis	2	Laparoscopy	left liver resection	190	100	No	0	0
141	M	66	No	NO	A	ICC	2	Laparoscopy	left liver resection	330	1000	No	0	0
142	M	65	Yes	NO	A	HCC	2	Laparoscopy	left liver resection	100	50	No	0	0
143	M	55	Yes	NO	A	Benign tumor	2	Laparoscopy	left liver resection	150	300	No	0	0
144	M	69	No	NO	A	Hepatolithiasis	2	Laparoscopy	left liver resection	155	200	No	0	0
145	F	41	No	NO	A	Hepatolithiasis	2	Laparoscopy	left liver resection	210	200	No	0	0
146	F	20	No	NO	A	Hepatolithiasis	2	Laparoscopy	left liver resection	205	100	No	0	0
147	M	51	No	NO	A	ICC	2	Laparotomy	left liver resection	115	100	No	0	0
148	M	47	No	NO	A	ICC	2	Laparoscopy	right liver resection	150	335	No	0	1
149	M	75	Yes	NO	A	HCC	2	Laparoscopy	right liver resection	200	100	No	0	0
150	F	51	No	NO	A	Benign tumor	2	Laparotomy	right liver resection	180	250	No	0	0
151	M	68	No	NO	A	HCC	2	Laparoscopy	right liver resection	165	200	No	0	0
152	M	80	No	NO	A	HCC	2	Laparotomy	right liver resection	120	400	No	0	0
153	F	68	Yes	Yes	A	HCC	2	Laparotomy	right liver resection	205	400	No	0	0
154	M	42	Yes	Yes	A	HCC	2	Laparotomy	right liver resection	300	200	No	0	0
155	M	53	No	NO	A	liver metastases	2	Laparotomy	right liver resection	185	300	No	0	0
156	M	59	Yes	Yes	A	HCC	2	Laparoscopy	right liver resection	260	300	No	0	0
157	M	42	No	NO	A	ICC	2	Laparoscopy	right liver resection	190	100	No	0	1
158	M	66	Yes	Yes	A	HCC	2	Laparotomy	right liver resection	210	200	No	0	0
159	F	61	Yes	Yes	A	HCC	2	Laparoscopy	right liver resection	225	200	No	0	1
160	M	40	Yes	Yes	A	Benign tumor	2	Laparoscopy	right liver resection	315	200	No	0	0
161	M	67	Yes	Yes	A	HCC	2	Laparotomy	right liver resection	110	200	No	0	0
162	M	34	Yes	Yes	A	HCC	1	Laparoscopy	right liver resection	210	200	No	0	0
163	F	55	No	NO	A	Hepatolithiasis	2	Laparotomy	right liver resection	320	250	No	0	0
164	M	35	Yes	Yes	A	HCC	2	Laparoscopy	right liver resection	185	100	No	0	1
165	M	51	Yes	Yes	A	HCC	2	Laparotomy	right liver resection	375	1000	No	0	0
166	F	46	No	NO	A	Benign tumor	1	Laparoscopy	right liver resection	200	200	No	0	0
167	M	70	No	NO	A	ICC	2	Laparotomy	right liver resection	330	1000	No	0	0
168	M	76	Yes	Yes	A	ICC	2	Laparoscopy	right liver resection	160	3000	No	0	0
169	F	72	No	NO	A	Benign tumor	2	Laparotomy	right liver resection	230	300	No	0	0
170	F	52	No	NO	A	Benign tumor	1	Laparoscopy	right liver resection	320	200	No	0	0
171	M	62	Yes	NO	A	Benign tumor	3	Laparoscopy	right liver resection	275	500	No	0	0
172	F	63	No	Yes	A	Hepatolithiasis	2	Laparotomy	right liver resection	195	30	No	0	0
173	M	53	Yes	Yes	A	HCC	1	Laparotomy	right liver resection	345	800	No	0	0
174	M	72	No	NO	A	HCC	2	Laparoscopy	right liver resection	368	150	No	0	1
175	M	75	No	Yes	A	Hepatolithiasis	2	Laparoscopy	left liver resection	505	400	Yes	2	1
176	M	64	No	NO	A	Hepatolithiasis	2	Laparoscopy	left liver resection	395	700	Yes	1	1
177	F	64	Yes	NO	A	Hepatolithiasis	2	Laparoscopy	left liver resection	235	400	Yes	1	1
178	M	60	No	NO	A	ICC	2	Laparotomy	left liver resection	340	1500	Yes	1	1
179	M	72	No	NO	A	liver metastases	2	Laparotomy	left liver resection	505	500	Yes	2	1
180	F	51	No	NO	A	Hepatolithiasis	2	Laparoscopy	left liver resection	285	200	Yes	1	1
181	M	67	No	NO	A	Hepatolithiasis	2	Laparoscopy	left liver resection	185	100	Yes	1	1
182	F	69	No	NO	A	ICC	2	Laparoscopy	left liver resection	395	200	Yes	1	0
183	M	74	No	NO	B	ICC	2	Laparotomy	left liver resection	505	200	Yes	2	1
184	F	65	No	NO	A	Hepatolithiasis	3	Laparoscopy	left liver resection	505	200	Yes	2	1
185	M	53	No	Yes	B	HCC	3	Laparotomy	left liver resection	430	2500	Yes	3	1
186	M	65	No	NO	B	ICC	2	Laparotomy	left liver resection	505	200	Yes	2	0
187	M	51	Yes	NO	A	ICC	2	Laparotomy	left liver resection	120	400	Yes	1	1
188	M	64	Yes	Yes	A	HCC	2	Laparoscopy	left liver resection	505	1000	Yes	2	1
189	M	61	No	Yes	A	HCC	2	Laparotomy	left liver resection	505	400	Yes	2	1
190	M	45	Yes	Yes	A	HCC	2	Laparotomy	left liver resection	505	800	Yes	2	1
191	M	73	No	NO	A	ICC	3	Laparoscopy	left liver resection	505	400	Yes	2	0
192	M	74	No	NO	A	HCC	2	Laparotomy	right liver resection	505	500	Yes	2	1
193	M	72	Yes	NO	A	ICC	2	Laparoscopy	right liver resection	210	100	Yes	1	1
194	F	76	No	Yes	A	Hepatolithiasis	2	Laparoscopy	right liver resection	420	200	Yes	1	1
195	M	56	No	NO	A	ICC	2	Laparotomy	right liver resection	405	500	Yes	1	1
196	F	71	No	NO	A	Benign tumor	2	Laparoscopy	right liver resection	295	200	Yes	1	1
197	M	79	No	NO	A	ICC	2	Laparoscopy	right liver resection	395	200	Yes	3	1
198	F	51	No	NO	B	ICC	2	Laparotomy	right liver resection	505	1000	Yes	2	0
199	F	40	No	NO	B	Hepatolithiasis	2	Laparoscopy	right liver resection	505	300	Yes	2	1
200	F	71	No	NO	A	ICC	2	Laparotomy	right liver resection	505	200	Yes	2	0
201	F	70	No	NO	A	ICC	2	Laparotomy	right liver resection	505	800	Yes	2	1
202	F	73	Yes	NO	A	ICC	2	Laparotomy	right liver resection	505	800	Yes	2	1
203	F	52	No	Yes	A	ICC	2	Laparotomy	right liver resection	505	400	Yes	2	1
204	F	73	No	NO	A	ICC	2	Laparotomy	right liver resection	505	800	Yes	2	0
205	M	54	Yes	Yes	A	HCC	2	Laparoscopy	right liver resection	505	800	Yes	2	1
206	M	36	Yes	NO	A	HCC	2	Laparotomy	right liver resection	505	600	Yes	2	1
207	M	67	Yes	Yes	A	HCC	2	Laparoscopy	right liver resection	505	1000	Yes	2	1
208	M	63	Yes	Yes	A	HCC	2	Laparoscopy	right liver resection	505	300	Yes	2	1
209	M	28	Yes	Yes	A	HCC	2	Laparotomy	right liver resection	505	350	Yes	2	0
210	F	59	Yes	Yes	A	HCC	2	Laparoscopy	right liver resection	150	200	Yes	1	1
211	F	48	No	NO	A	ICC	2	Laparotomy	right liver resection	505	1000	Yes	2	0
212	M	54	Yes	Yes	A	HCC	2	Laparotomy	right liver resection	505	4000	Yes	2	1
213	M	77	Yes	Yes	A	HCC	2	Laparoscopy	right liver resection	505	1500	Yes	2	0
214	M	64	Yes	Yes	A	HCC	2	Laparoscopy	right liver resection	505	300	Yes	2	1
215	F	49	No	NO	A	HCC	2	Laparoscopy	left liver resection	240	100	Yes	1	0
216	M	76	Yes	Yes	A	HCC	2	Laparoscopy	left liver resection	300	300	Yes	1	1
217	M	63	No	Yes	A	Hepatolithiasis	2	Laparoscopy	left liver resection	200	100	Yes	1	1
218	M	55	Yes	NO	A	HCC	2	Laparoscopy	left liver resection	180	300	Yes	1	1
219	M	61	Yes	NO	A	HCC	2	Laparotomy	left liver resection	190	200	Yes	1	1
220	F	68	No	NO	A	ICC	2	Laparoscopy	left liver resection	340	500	Yes	1	1
221	M	75	No	NO	A	HCC	2	Laparoscopy	left liver resection	210	200	Yes	1	0
222	M	71	Yes	NO	A	HCC	2	Laparoscopy	left liver resection	505	100	Yes	2	1
223	F	45	Yes	NO	A	ICC	2	Laparoscopy	left liver resection	240	200	Yes	1	0
224	F	41	Yes	Yes	A	HCC	2	Laparoscopy	left liver resection	505	500	Yes	2	0
225	M	70	No	NO	A	ICC	2	Laparoscopy	left liver resection	145	150	Yes	1	1
226	M	73	Yes	Yes	A	HCC	2	Laparoscopy	left liver resection	505	50	Yes	2	1
227	F	83	No	NO	A	Hepatolithiasis	2	Laparoscopy	left liver resection	505	50	Yes	2	1
228	M	68	Yes	Yes	A	HCC	2	Laparoscopy	left liver resection	100	50	Yes	1	1
229	M	82	No	NO	A	ICC	2	Laparotomy	left liver resection	505	400	Yes	2	1
230	M	58	Yes	NO	A	HCC	2	Laparoscopy	left liver resection	505	200	Yes	2	1
231	M	60	No	NO	A	HCC	2	Laparoscopy	right liver resection	250	300	Yes	1	1
232	F	67	No	NO	A	ICC	2	Laparoscopy	right liver resection	315	800	Yes	1	1
233	F	63	No	NO	A	ICC	2	Laparoscopy	right liver resection	270	200	Yes	1	0
234	M	81	Yes	Yes	A	HCC	2	Laparoscopy	right liver resection	505	2000	Yes	2	1
235	F	70	Yes	Yes	A	HCC	2	Laparoscopy	right liver resection	160	100	Yes	1	0
236	M	72	Yes	Yes	A	HCC	2	Laparotomy	right liver resection	505	400	Yes	2	1
237	F	58	Yes	Yes	A	HCC	2	Laparoscopy	right liver resection	420	3000	Yes	3	1
238	M	62	Yes	NO	A	HCC	2	Laparotomy	right liver resection	505	2500	Yes	2	1
239	M	62	Yes	Yes	A	HCC	2	Laparotomy	right liver resection	140	150	Yes	3	0
240	M	52	Yes	Yes	A	HCC	2	Laparotomy	right liver resection	220	100	Yes	1	1
241	M	69	Yes	Yes	B	HCC	2	Laparoscopy	right liver resection	180	100	Yes	1	1
242	M	80	Yes	Yes	A	HCC	2	Laparotomy	right liver resection	505	200	Yes	2	1
243	M	62	Yes	Yes	A	HCC	2	Laparoscopy	right liver resection	505	800	Yes	2	1
244	F	65	Yes	Yes	A	HCC	2	Laparoscopy	right liver resection	165	800	Yes	1	1
245	M	23	Yes	Yes	A	HCC	2	Laparotomy	right liver resection	505	500	Yes	2	1
246	M	55	No	NO	A	ICC	2	Laparoscopy	right liver resection	505	100	Yes	2	0
247	M	61	Yes	Yes	A	HCC	2	Laparoscopy	right liver resection	130	100	Yes	1	0
248	M	65	Yes	Yes	A	HCC	2	Laparoscopy	right liver resection	175	200	Yes	1	1
249	M	37	No	NO	A	Hepatolithiasis	1	Laparoscopy	right liver resection	505	800	Yes	2	1
250	M	64	Yes	Yes	A	HCC	2	Laparoscopy	right liver resection	140	20	Yes	1	1
251	M	67	No	NO	A	liver metastases	2	Laparotomy	right liver resection	505	300	Yes	2	1
252	F	70	No	NO	A	ICC	2	Laparoscopy	right liver resection	505	1000	Yes	2	1
253	F	61	No	NO	A	Benign tumor	2	Laparoscopy	right liver resection	505	200	Yes	2	1
254	F	65	Yes	Yes	A	HCC	2	Laparotomy	right liver resection	220	800	Yes	3	0
255	F	66	No	NO	A	ICC	1	Laparoscopy	right liver resection	285	300	Yes	3	0
256	M	57	No	NO	A	HCC	2	Laparoscopy	right liver resection	180	100	Yes	1	0
257	M	49	Yes	Yes	A	HCC	2	Laparoscopy	right liver resection	270	100	Yes	3	1
258	M	73	Yes	NO	A	ICC	2	Laparoscopy	right liver resection	195	100	Yes	1	1
259	M	48	Yes	Yes	A	HCC	2	Laparotomy	right liver resection	320	5000	Yes	3	1
260	M	61	Yes	NO	A	HCC	2	Laparoscopy	right liver resection	300	1000	Yes	1	0
261	M	72	No	NO	A	HCC	2	Laparotomy	right liver resection	180	1000	Yes	1	0
262	M	57	Yes	Yes	A	HCC	2	Laparotomy	right liver resection	505	1000	Yes	2	0
263	M	60	Yes	Yes	A	HCC	2	Laparoscopy	right liver resection	220	200	Yes	1	0
264	M	37	Yes	Yes	A	HCC	2	Laparoscopy	right liver resection	285	200	Yes	1	1
265	F	67	No	NO	A	HCC	2	Laparoscopy	right liver resection	505	300	Yes	2	1
